# Supplementary material
Source: PubMed Central journal article supplement (PMC4680457)
Supplement: ijcep0008-13136-f3.pdf [file ijcep0008-13136-f3.pdf]

## Molecular biology & pathology of NSCLC

**Table S1.** Treatment and outcome of 29 patients with tumor tissue EGFR mutations

| Case No. | Sex | Age | Smoking status <sup>a</sup> | Tumor type              | EGFR mutation status in plasma | EGFR mutation status in tumor | TKIs      | PFS (month) | progress status <sup>c</sup> | OS/ month | Final status <sup>d</sup> |
|----------|-----|-----|-----------------------------|-------------------------|--------------------------------|-------------------------------|-----------|-------------|------------------------------|-----------|---------------------------|
| 1        | M   | 29  | 1                           | adenocarcinoma          | 19Del <sup>b</sup>             | 19Del                         | Erlotinib | 4.5         | 0                            | 10        | 0                         |
| 2        | M   | 45  | 1                           | adenocarcinoma          | 19Del                          | 19Del                         | Gefitinib | 6           | 0                            | 11.5      | 1                         |
| 3        | M   | 48  | 0                           | adenocarcinoma          | (-)                            | L858R                         | Gefitinib | 5           | 0                            | 16.5      | 1                         |
| 4        | F   | 63  | 0                           | adenocarcinoma          | 19Del                          | 19Del                         | Icotinib  | 9           | 0                            | 16        | 1                         |
| 5        | M   | 42  | 0                           | adenocarcinoma          | L858R                          | L858R                         | Gefitinib | 14          | 1                            | 16.5      | 1                         |
| 6        | F   | 77  | 0                           | adenocarcinoma          | L858R                          | L858R                         | Gefitinib | 14          | 1                            | 16.5      | 1                         |
| 7        | M   | 79  | 0                           | adenocarcinoma          | (-)                            | 19Del                         | Gefitinib | 14          | 1                            | 13.5      | 1                         |
| 8        | F   | 65  | 0                           | adenocarcinoma          | (-)                            | L858R                         | Gefitinib | 5           | 0                            | 14        | 1                         |
| 9        | M   | 49  | 1                           | adenocarcinoma          | (-)                            | 19Del                         | Gefitinib | 5.5         | 0                            | 13.5      | 1                         |
| 10       | F   | 66  | 0                           | adenocarcinoma          | L858R                          | L858R                         | Gefitinib | 7.5         | 0                            | 13.5      | 1                         |
| 11       | M   | 37  | 0                           | adenocarcinoma          | 19Del                          | 19Del                         | Gefitinib | 0.5         | 0                            | 6         | 0                         |
| 12       | M   | 59  | 0                           | adenocarcinoma          | L858R                          | L858R                         | Erlotinib | 5           | 0                            | 7         | 1                         |
| 13       | F   | 59  | 0                           | adenocarcinoma          | L858R                          | L858R                         | Gefitinib | 8           | 0                            | 9.5       | 0                         |
| 14       | F   | 58  | 0                           | adenocarcinoma          | T790M&L858R                    | T790M&L858R                   | Gefitinib | 1           | 0                            | 4.5       | 0                         |
| 15       | F   | 54  | 0                           | adenocarcinoma          | L858R                          | L858R                         | Gefitinib | 6           | 0                            | 6.5       | 1                         |
| 16       | M   | 62  | 1                           | Squamous cell carcinoma | (-)                            | L858R                         | Gefitinib | 3           | 0                            | 6.5       | 1                         |
| 17       | M   | 43  | 0                           | adenocarcinoma          | 19Del                          | 19Del                         | Gefitinib | 3           | 0                            | 6.5       | 1                         |
| 18       | M   | 68  | 1                           | adenocarcinoma          | 19Del                          | 19Del                         | Icotinib  | 8           | 0                            | 9.5       | 0                         |
| 19       | M   | 62  | 0                           | adenocarcinoma          | (-)                            | 19Del                         | Erlotinib | 5           | 0                            | 11        | 1                         |
| 20       | F   | 38  | 0                           | adenocarcinoma          | (-)                            | 19Del                         | Gefitinib | 10          | 1                            | 10.5      | 1                         |
| 21       | M   | 66  | 1                           | adenocarcinoma          | (-)                            | 19Del                         | Erlotinib | 6           | 1                            | 7         | 1                         |
| 22       | F   | 64  | 0                           | adenocarcinoma          | (-)                            | 19Del                         | Gefitinib | 3           | 0                            | 10        | 1                         |
| 23       | M   | 61  | 1                           | adenocarcinoma          | (-)                            | L858R                         | Erlotinib | 9           | 0                            | 10        | 1                         |
| 24       | F   | 49  | 0                           | adenocarcinoma          | (-)                            | L858R                         | Gefitinib | 2           | 1                            | 2         | 1                         |
| 25       | F   | 51  | 0                           | adenocarcinoma          | 19Del                          | 19Del                         | Gefitinib | 2           | 0                            | 10.5      | 1                         |
| 26       | F   | 66  | 0                           | adenocarcinoma          | (-)                            | L858R                         | Gefitinib | 9           | 1                            | 9.5       | 1                         |
| 27       | M   | 69  | 0                           | adenocarcinoma          | (-)                            | 19Del                         | Gefitinib | 9           | 1                            | 9         | 1                         |
| 28       | F   | 48  | 0                           | adenocarcinoma          | (-)                            | 19Del&G719X                   | Gefitinib | 5           | 0                            | 8.5       | 1                         |
| 29       | F   | 62  | 0                           | adenocarcinoma          | (-)                            | L858R                         | Gefitinib | 8           | 1                            | 8         | 1                         |

<sup>a</sup>0, never; 1, ever; <sup>b</sup>deletions in exon 19; <sup>c</sup>0, no progression; 1, progression; <sup>d</sup>0, alive at last follow-up; 1, death.
